# Supplementary material for: Bull Shark (Carcharhinus leucas) Occurrence along Beaches of South-Eastern Australia: Understanding Where, When and Why
Source: MDPI journal article supplement (doi:10.3390/biology12091189), 2023-08-31
Supplement: s1 [file s1]

**Table S1.** Details of tag deployments for 111 bull sharks tagged and detected along the New South Wales coast between 2010 and 2022. Date format is day/month/year. Including the number of: (i) shark listening stations each individual was detected on and (ii) number of IMOS stations each individual was detected on after the last detection on the shark listening station.

| ID        | Date tagged | Latitude tagged | Type of habitat | Sex    | Total length (cm) | Tag placement | Date of first detection | Date of last detection | Size at first detection (TL, cm) | Total number of detections | No. of shark listening stations visited | No. of IMOS stations visited |
|-----------|-------------|-----------------|-----------------|--------|-------------------|---------------|-------------------------|------------------------|----------------------------------|----------------------------|-----------------------------------------|------------------------------|
| 1466-1467 | 21/01/2010  | -33.846         | Coastal         | Male   | 257               | Internal      | 30/12/2017              | 28/04/2018             | 257                              | 7                          | 2                                       | 0                            |
| 1452-1453 | 5/11/2010   | -29.385         | Estuarine       | Female | 140               | Internal      | 19/07/2017              | 30/05/2018             | 190                              | 68                         | 1                                       | 0                            |
| 1438-1439 | 7/11/2010   | -29.391         | Estuarine       | Male   | 128               | Internal      | 7/02/2018               | 8/01/2019              | 190                              | 247                        | 5                                       | 0                            |
| 64936     | 7/11/2010   | -29.385         | Estuarine       | Male   | 101               | Internal      | 18/07/2017              | 20/11/2019             | 190                              | 79                         | 8                                       | 0                            |
| 1442-1443 | 6/12/2010   | -29.422         | Estuarine       | Male   | 155               | Internal      | 14/01/2018              | 31/05/2018             | 190                              | 16                         | 5                                       | 0                            |
| 64931     | 6/12/2010   | -29.303         | Estuarine       | Female | 80                | Internal      | 26/04/2019              | 16/12/2020             | 183                              | 102                        | 7                                       | 1                            |
| 1446-1447 | 7/12/2010   | -29.431         | Estuarine       | Female | 102               | Internal      | 28/12/2017              | 31/12/2017             | 302                              | 3                          | 2                                       | 0                            |
| 64927     | 10/12/2010  | -29.422         | Estuarine       | Female | 145               | Internal      | 25/01/2018              | 14/03/2020             | 190                              | 13                         | 2                                       | 1                            |
| 1458-1459 | 12/12/2010  | -29.422         | Estuarine       | Female | 320               | Internal      | 12/11/2018              | 6/03/2020              | 320                              | 39                         | 4                                       | 0                            |
| 64317     | 1/02/2011   | -33.842         | Coastal         | Male   | 260               | Internal      | 6/01/2018               | 16/02/2019             | 260                              | 21                         | 3                                       | 6                            |
| 64321     | 4/02/2011   | -33.842         | Coastal         | Female | 264               | Internal      | 17/02/2020              | 14/03/2020             | 264                              | 5                          | 2                                       | 0                            |
| 31930     | 2/03/2011   | -29.416         | Estuarine       | Female | 148               | Internal      | 7/02/2018               | 25/03/2019             | 190                              | 28                         | 4                                       | 33                           |
| 31938     | 2/03/2011   | -29.426         | Estuarine       | Female | 190               | Internal      | 19/10/2017              | 6/02/2020              | 190                              | 120                        | 11                                      | 0                            |
| 14685     | 21/01/2016  | -33.864         | Coastal         | Male   | 223               | Internal      | 3/01/2018               | 28/12/2022             | 223                              | 16                         | 3                                       | 0                            |
| 20462     | 3/02/2016   | -28.870         | Estuarine       | Male   | 176               | Internal      | 13/08/2017              | 2/05/2020              | 190                              | 66                         | 6                                       | 1                            |
| 20464     | 3/02/2016   | -28.878         | Estuarine       | Female | 152               | Internal      | 13/07/2017              | 4/11/2022              | 170                              | 908                        | 9                                       | 0                            |
| 20470     | 4/02/2016   | -28.877         | Estuarine       | Male   | 187               | Internal      | 7/12/2017               | 16/03/2021             | 187                              | 204                        | 5                                       | 9                            |
| 20461     | 1/03/2016   | -33.847         | Coastal         | Male   | 273               | Internal      | 26/02/2019              | 13/12/2019             | 273                              | 15                         | 5                                       | 26                           |
| 20463     | 1/03/2016   | -33.845         | Coastal         | Male   | 249               | Internal      | 9/12/2017               | 2/05/2020              | 249                              | 19                         | 5                                       | 22                           |
| 20467     | 3/03/2016   | -33.854         | Coastal         | Male   | 280               | Internal      | 27/12/2017              | 16/03/2021             | 280                              | 15                         | 4                                       | 16                           |
| 20466     | 7/03/2016   | -33.841         | Coastal         | Male   | 274               | Internal      | 17/04/2019              | 17/04/2019             | 274                              | 4                          | 1                                       | 21                           |
| 18829     | 14/12/2016  | -31.878         | Estuarine       | Female | 168               | Internal      | 24/07/2017              | 18/07/2021             | 175                              | 628                        | 13                                      | 14                           |
| 18767     | 19/12/2016  | -30.458         | Coastal         | Male   | 160               | Internal      | 14/07/2017              | 6/05/2021              | 168                              | 1736                       | 11                                      | 9                            |
| 18759     | 20/12/2016  | -30.446         | Coastal         | Female | 290               | Internal      | 9/12/2018               | 30/12/2022             | 290                              | 45                         | 4                                       | 1                            |
| 29678     | 13/02/2017  | -33.845         | Coastal         | Female | 231               | Internal      | 28/10/2017              | 24/04/2018             | 231                              | 8                          | 3                                       | 0                            |
| 29679     | 13/02/2017  | -33.841         | Coastal         | Male   | 300               | Internal      | 30/12/2017              | 30/12/2017             | 300                              | 3                          | 1                                       | 25                           |

|       |            |         |           |        |       |          |            |            |     |      |    |    |
|-------|------------|---------|-----------|--------|-------|----------|------------|------------|-----|------|----|----|
| 18831 | 16/02/2017 | -30.490 | Estuarine | Female | 173   | Internal | 26/02/2018 | 15/05/2021 | 184 | 763  | 7  | 17 |
| 29680 | 21/02/2017 | -33.855 | Coastal   | Male   | 220   | Internal | 2/01/2018  | 1/03/2021  | 220 | 46   | 12 | 17 |
| 18753 | 23/02/2017 | -28.877 | Estuarine | Male   | 158   | Internal | 11/02/2018 | 27/05/2020 | 172 | 550  | 8  | 0  |
| 18827 | 23/02/2017 | -28.875 | Estuarine | Male   | 162   | Internal | 24/07/2017 | 10/08/2019 | 168 | 158  | 4  | 0  |
| 18755 | 24/02/2017 | -28.875 | Estuarine | Male   | 151   | Internal | 21/07/2017 | 12/07/2021 | 157 | 481  | 6  | 12 |
| 18757 | 24/02/2017 | -28.878 | Estuarine | Male   | 153   | Internal | 13/07/2017 | 13/04/2021 | 159 | 547  | 8  | 12 |
| 29683 | 2/03/2017  | -33.848 | Coastal   | Male   | 278   | Internal | 8/02/2019  | 15/03/2019 | 278 | 4    | 2  | 9  |
| 12545 | 15/11/2017 | -31.877 | Estuarine | Female | 291   | External | 27/11/2017 | 2/02/2018  | 291 | 305  | 3  | 0  |
| 14230 | 20/11/2017 | -30.447 | Coastal   | Female | 155   | Internal | 6/04/2020  | 6/07/2020  | 182 | 76   | 4  | 10 |
| 18784 | 20/11/2017 | -30.452 | Coastal   | Female | 158   | Internal | 17/06/2019 | 14/06/2021 | 176 | 324  | 8  | 10 |
| 14270 | 23/11/2017 | -30.490 | Coastal   | Female | 178   | Internal | 17/10/2018 | 31/03/2020 | 187 | 125  | 7  | 10 |
| 16429 | 23/11/2017 | -28.882 | Coastal   | Female | 290   | External | 24/11/2017 | 30/11/2017 | 290 | 47   | 3  | 0  |
| 14263 | 29/11/2017 | -28.879 | Estuarine | Female | 277   | Internal | 2/12/2017  | 5/12/2022  | 277 | 155  | 12 | 3  |
| 14269 | 29/11/2017 | -28.878 | Estuarine | Female | 158   | Internal | 26/03/2018 | 9/06/2021  | 162 | 561  | 6  | 5  |
| 18785 | 29/11/2017 | -28.877 | Estuarine | Female | 303   | Internal | 1/12/2019  | 19/12/2019 | 303 | 20   | 2  | 0  |
| 12547 | 7/01/2018  | -31.877 | Estuarine | Female | 286.5 | External | 10/01/2018 | 10/01/2018 | 287 | 12   | 1  | 0  |
| 29697 | 11/01/2018 | -33.846 | Coastal   | Male   | 204   | Internal | 16/02/2019 | 2/02/2021  | 204 | 7    | 2  | 13 |
| 18826 | 18/01/2018 | -33.846 | Coastal   | Male   | 270   | Internal | 4/01/2019  | 19/03/2021 | 270 | 11   | 5  | 25 |
| 20468 | 18/01/2018 | -33.846 | Coastal   | Female | 295   | Internal | 4/12/2019  | 4/12/2019  | 295 | 1    | 1  | 8  |
| 20469 | 22/01/2018 | -33.855 | Coastal   | Female | 292   | Internal | 27/04/2018 | 2/01/2023  | 292 | 68   | 5  | 6  |
| 12950 | 23/01/2018 | -28.841 | Coastal   | Female | 254   | External | 27/10/2018 | 11/03/2021 | 254 | 54   | 2  | 0  |
| 18828 | 24/01/2018 | -33.844 | Coastal   | Male   | 270   | Internal | 3/02/2018  | 11/03/2021 | 270 | 9    | 3  | 21 |
| 18750 | 29/01/2018 | -33.853 | Coastal   | Female | 265   | Internal | 11/02/2018 | 11/02/2018 | 265 | 2    | 1  | 0  |
| 18754 | 15/02/2018 | -33.849 | Coastal   | Male   | 285   | Internal | 7/01/2019  | 7/03/2021  | 285 | 15   | 5  | 16 |
| 18824 | 15/02/2018 | -33.837 | Coastal   | Male   | 292   | Internal | 7/05/2018  | 7/05/2018  | 292 | 1    | 1  | 37 |
| 18762 | 21/02/2018 | -33.837 | Coastal   | Male   | 255   | Internal | 16/04/2018 | 6/01/2021  | 255 | 45   | 6  | 17 |
| 18822 | 21/02/2018 | -33.836 | Coastal   | Female | 292   | Internal | 28/03/2018 | 11/03/2019 | 292 | 20   | 7  | 7  |
| 18752 | 22/02/2018 | -33.846 | Coastal   | Male   | 249   | Internal | 7/03/2018  | 30/12/2022 | 249 | 53   | 11 | 3  |
| 18763 | 27/02/2018 | -33.836 | Coastal   | Male   | 270   | Internal | 26/03/2018 | 8/04/2021  | 270 | 2    | 2  | 8  |
| 12951 | 26/04/2018 | -28.832 | Coastal   | Male   | 193   | External | 26/04/2018 | 10/07/2020 | 193 | 101  | 3  | 1  |
| 12279 | 3/05/2018  | -28.882 | Coastal   | Female | 180   | External | 9/05/2018  | 18/06/2018 | 180 | 190  | 6  | 2  |
| 12298 | 6/05/2018  | -29.113 | Coastal   | Female | 172   | External | 12/05/2018 | 13/08/2018 | 172 | 278  | 6  | 0  |
| 12317 | 16/06/2018 | -29.098 | Coastal   | Male   | 181   | External | 20/06/2018 | 6/11/2018  | 181 | 26   | 4  | 0  |
| 12548 | 16/11/2018 | -31.873 | Estuarine | Male   | 196   | External | 26/02/2019 | 14/11/2019 | 196 | 1166 | 8  | 0  |
| 12549 | 18/11/2018 | -31.873 | Estuarine | Female | 310   | External | 25/11/2018 | 25/11/2018 | 310 | 8    | 2  | 3  |
| 12551 | 25/12/2018 | -31.873 | Estuarine | Male   | 288   | External | 26/12/2018 | 13/01/2021 | 288 | 58   | 5  | 0  |

|           |            |         |           |        |     |          |            |            |     |      |    |   |
|-----------|------------|---------|-----------|--------|-----|----------|------------|------------|-----|------|----|---|
| 11979     | 29/01/2019 | -33.843 | Coastal   | Male   | 237 | Internal | 27/02/2019 | 2/01/2023  | 237 | 52   | 10 | 0 |
| 18830     | 29/01/2019 | -33.842 | Coastal   | Male   | 272 | Internal | 17/03/2020 | 9/03/2021  | 272 | 28   | 6  | 0 |
| 11980     | 30/01/2019 | -33.842 | Coastal   | Male   | 290 | Internal | 29/04/2020 | 12/05/2021 | 290 | 18   | 6  | 0 |
| 11981     | 30/01/2019 | -33.864 | Coastal   | Male   | 297 | Internal | 25/02/2019 | 26/12/2022 | 297 | 49   | 8  | 0 |
| 11982     | 12/02/2019 | -33.854 | Coastal   | Male   | 281 | Internal | 28/02/2019 | 13/04/2021 | 281 | 41   | 4  | 0 |
| 11983     | 19/02/2019 | -33.848 | Coastal   | Male   | 252 | Internal | 11/05/2019 | 8/12/2022  | 252 | 101  | 11 | 0 |
| 11984     | 19/02/2019 | -33.841 | Coastal   | Male   | 287 | Internal | 31/03/2020 | 13/03/2021 | 287 | 47   | 1  | 0 |
| 11985     | 6/03/2019  | -33.841 | Coastal   | Male   | 285 | Internal | 6/02/2020  | 30/04/2021 | 285 | 120  | 4  | 0 |
| 11991     | 19/03/2019 | -33.853 | Coastal   | Male   | 251 | Internal | 11/02/2021 | 22/03/2021 | 251 | 24   | 1  | 0 |
| 11986     | 21/03/2019 | -33.864 | Coastal   | Female | 255 | Internal | 6/04/2019  | 11/12/2022 | 255 | 77   | 16 | 0 |
| 12552     | 22/03/2019 | -32.330 | Coastal   | Female | 280 | External | 8/11/2019  | 10/11/2019 | 280 | 21   | 5  | 0 |
| 11987     | 27/03/2019 | -33.864 | Coastal   | Female | 207 | Internal | 16/04/2019 | 5/04/2021  | 207 | 74   | 12 | 0 |
| 12555     | 6/04/2019  | -32.330 | Coastal   | Male   | 240 | External | 4/05/2019  | 4/05/2019  | 240 | 5    | 1  | 0 |
| 12556     | 22/11/2019 | -31.871 | Estuarine | Female | 188 | External | 18/02/2020 | 18/02/2020 | 188 | 3    | 1  | 0 |
| 8132      | 10/01/2020 | -31.877 | Estuarine | Male   | 226 | External | 21/01/2020 | 29/03/2021 | 226 | 77   | 6  | 0 |
| 5838      | 19/02/2020 | -29.105 | Coastal   | Female | 190 | External | 20/02/2020 | 20/02/2020 | 190 | 5    | 1  | 8 |
| 12020     | 19/03/2020 | -33.854 | Coastal   | Male   | 207 | Internal | 8/12/2020  | 2/03/2021  | 207 | 28   | 7  | 0 |
| 11988     | 20/01/2021 | -33.846 | Coastal   | Female | 241 | Internal | 23/02/2021 | 1/01/2023  | 241 | 17   | 3  | 0 |
| 4326-4327 | 22/01/2021 | -29.113 | Coastal   | Male   | 195 | External | 9/02/2021  | 8/12/2022  | 195 | 48   | 12 | 0 |
| 11990     | 1/02/2021  | -33.841 | Coastal   | Male   | 286 | Internal | 10/03/2021 | 30/12/2022 | 286 | 4    | 3  | 0 |
| 11993     | 1/02/2021  | -33.846 | Coastal   | Female | 309 | Internal | 23/02/2021 | 2/03/2021  | 309 | 8    | 2  | 0 |
| 12017     | 1/02/2021  | -33.854 | Coastal   | Female | 250 | Internal | 8/02/2021  | 19/11/2022 | 250 | 36   | 8  | 0 |
| 11989     | 4/02/2021  | -33.844 | Coastal   | Female | 264 | Internal | 10/03/2021 | 16/11/2022 | 264 | 17   | 5  | 0 |
| 12019     | 4/02/2021  | -33.840 | Coastal   | Male   | 255 | Internal | 11/02/2021 | 21/04/2021 | 255 | 21   | 2  | 0 |
| 11997     | 18/02/2021 | -33.846 | Coastal   | Female | 230 | Internal | 11/03/2021 | 31/12/2022 | 230 | 35   | 11 | 0 |
| 4302-4303 | 25/02/2021 | -28.839 | Coastal   | Female | 177 | External | 25/03/2021 | 27/04/2021 | 178 | 277  | 1  | 0 |
| 4304-4305 | 26/02/2021 | -29.113 | Coastal   | Female | 185 | External | 5/03/2021  | 28/12/2022 | 185 | 1446 | 6  | 0 |
| 4322-4323 | 28/03/2021 | -28.884 | Coastal   | Female | 175 | External | 5/04/2021  | 26/04/2021 | 175 | 10   | 2  | 0 |
| 4344-4345 | 17/04/2021 | -28.868 | Coastal   | Female | 195 | External | 17/04/2021 | 18/04/2021 | 195 | 4    | 1  | 0 |
| 4182-4183 | 6/12/2021  | -29.090 | Coastal   | Female | 283 | External | 12/12/2022 | 30/12/2022 | 283 | 25   | 4  | 0 |
| 4174-4175 | 12/01/2022 | -29.090 | Coastal   | Female | 185 | External | 19/11/2022 | 26/12/2022 | 185 | 65   | 1  | 0 |
| 3802-3803 | 15/01/2022 | -29.435 | Coastal   | Male   | 182 | External | 6/12/2022  | 28/12/2022 | 182 | 62   | 3  | 0 |
| 3934-3935 | 27/01/2022 | -28.848 | Coastal   | Male   | 182 | External | 7/01/2023  | 7/01/2023  | 182 | 5    | 2  | 0 |
| 3914-3915 | 10/02/2022 | -28.832 | Coastal   | Male   | 188 | External | 21/11/2022 | 23/11/2022 | 188 | 41   | 2  | 0 |
| 3962-3963 | 15/02/2022 | -28.873 | Coastal   | Male   | 186 | External | 15/12/2022 | 22/12/2022 | 186 | 28   | 5  | 0 |
| 3992-3993 | 8/03/2022  | -28.309 | Coastal   | Male   | 203 | External | 10/12/2022 | 10/12/2022 | 203 | 1    | 1  | 0 |

|             |            |         |         |        |     |          |            |            |     |    |   |   |
|-------------|------------|---------|---------|--------|-----|----------|------------|------------|-----|----|---|---|
| 13230-13231 | 23/03/2022 | -28.881 | Coastal | Male   | 173 | External | 9/11/2022  | 2/12/2022  | 181 | 19 | 3 | 0 |
| 3920-3921   | 23/03/2022 | -30.273 | Coastal | Female | 178 | External | 15/12/2022 | 7/01/2023  | 185 | 64 | 5 | 0 |
| 13835-13836 | 11/04/2022 | -29.098 | Coastal | Female | 242 | External | 10/12/2022 | 21/12/2022 | 242 | 24 | 1 | 0 |
| 13224-13225 | 29/04/2022 | -28.824 | Coastal | Female | 204 | External | 4/01/2023  | 4/01/2023  | 204 | 6  | 1 | 0 |
| 13226-13227 | 22/05/2022 | -30.353 | Coastal | Male   | 196 | External | 10/12/2022 | 10/12/2022 | 196 | 13 | 1 | 0 |
| 3770-3771   | 16/06/2022 | -29.476 | Coastal | Female | 188 | External | 4/11/2022  | 10/11/2022 | 188 | 26 | 2 | 0 |
| 61036       | 14/11/2022 | -30.880 | Coastal | Female | 293 | External | 17/11/2022 | 24/12/2022 | 293 | 77 | 9 | 0 |
| 61039       | 14/11/2022 | -30.880 | Coastal | Female | 302 | External | 17/11/2022 | 27/11/2022 | 302 | 54 | 1 | 0 |
| 61040       | 19/11/2022 | -30.755 | Coastal | Female | 302 | External | 23/11/2022 | 16/12/2022 | 302 | 54 | 6 | 0 |
| 4024-4025   | 25/11/2022 | -30.273 | Coastal | Female | 165 | External | 26/11/2022 | 26/11/2022 | 165 | 7  | 1 | 0 |
| 4006-4007   | 5/12/2022  | -29.416 | Coastal | Female | 183 | External | 6/12/2022  | 6/12/2022  | 183 | 4  | 1 | 0 |
| 11969-11970 | 6/12/2022  | -29.113 | Coastal | Male   | 213 | External | 18/12/2022 | 24/12/2022 | 213 | 14 | 1 | 0 |
| 11300-11301 | 14/12/2022 | -30.284 | Coastal | Female | 197 | External | 22/12/2022 | 9/01/2023  | 197 | 10 | 1 | 0 |

**Table S2.** Minimum, maximum, mean and standard error of the number of days those individuals were detected along the coast of NSW.

| Group                         | Min | Max | Mean | Standard Error |
|-------------------------------|-----|-----|------|----------------|
| Juveniles<br>(80-174 cm)      | 1   | 50  | 21.9 | 5.3            |
| Large males<br>(176-312 cm)   | 1   | 103 | 13.7 | 2.6            |
| Large females<br>(175-322 cm) | 1   | 117 | 15.9 | 3.2            |

**Table S3.** Variable selection procedure of generalized additive mixed models of large bull shark occurrence along the coast of NSW, comprising the candidate explanatory environmental variables daily rainfall (Rain), swell height (Height), tidal height (Tide), water temperature (Temp) and moon phase (Moon). Included are the respective Akaike Information Criterion (AIC), delta AIC ( $\Delta$ AIC) and Akaike weights (AIC<sub>w</sub>). (\*) Variables discarded due to lack of statistical significance.

| Model                       | AIC             | $\Delta$ AIC | AIC <sub>w</sub> |
|-----------------------------|-----------------|--------------|------------------|
| Null                        | 40531.28        | 3378.04      | < 0.0001         |
| Rain                        | 40524.96        | 3371.72      | < 0.0001         |
| Height                      | 40123.11        | 2969.87      | < 0.0001         |
| Tide*                       |                 |              |                  |
| Temp                        | 37279.51        | 126.27       | < 0.0001         |
| Moon                        | 40523.93        | 3370.69      | < 0.0001         |
| Temp + Rain                 | 37188.13        | 34.89        | < 0.0001         |
| Temp + Height               | 37261.72        | 108.48       | < 0.0001         |
| Temp + Moon*                |                 |              |                  |
| <b>Temp + Rain + Height</b> | <b>37153.24</b> | <b>0</b>     | <b>0.9999</b>    |

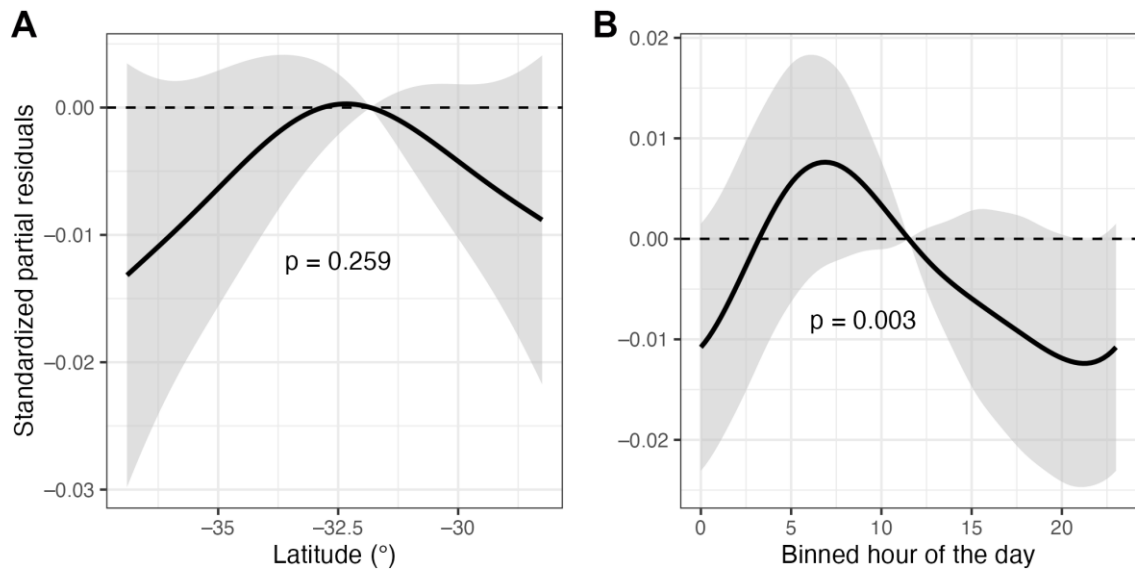

**Figure S1:** Shark listening station detection probabilities as a function of the variables (A) latitude (non-significant) and (B) hour of the day (significant).

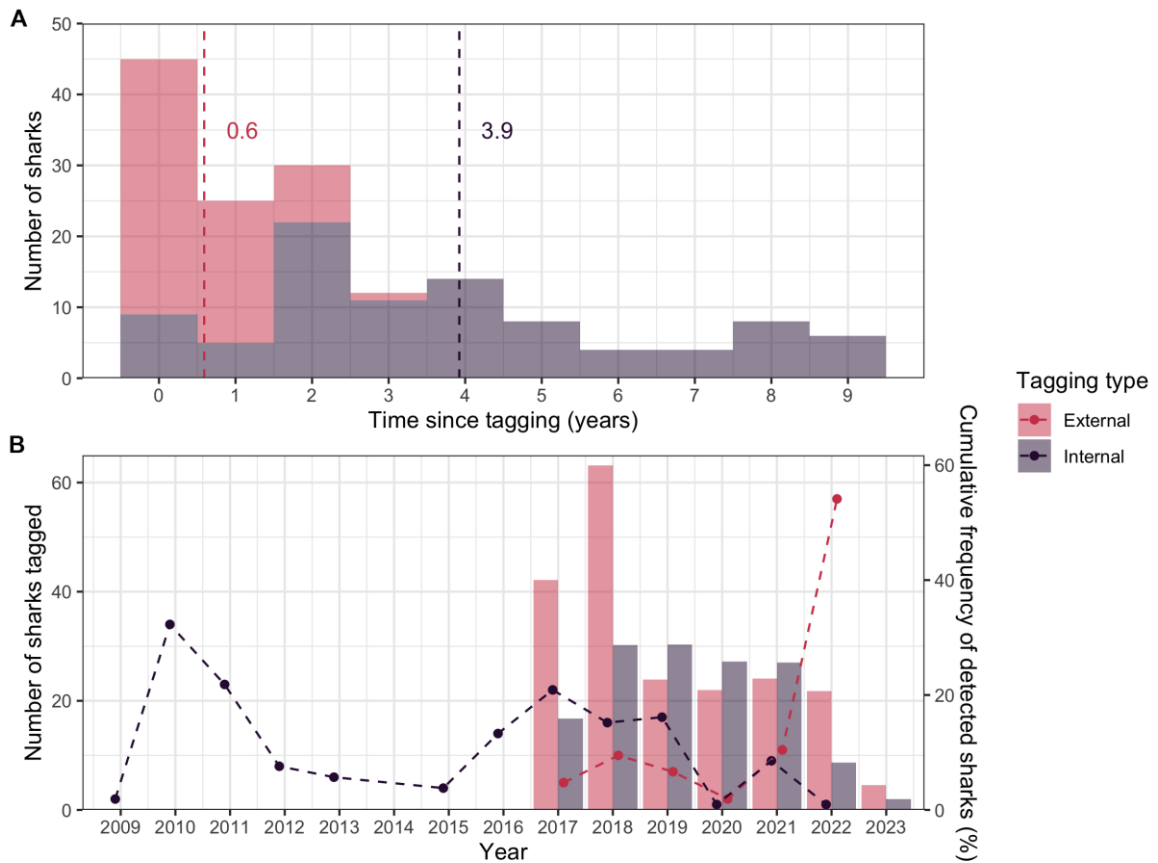

**Figure S2:** Histograms of acoustic detections (A) as a function of time since tagging and (B) yearly number of sharks tagged (point) together with their corresponding frequencies of redetection (bars), for externally and internally tagged bull sharks.

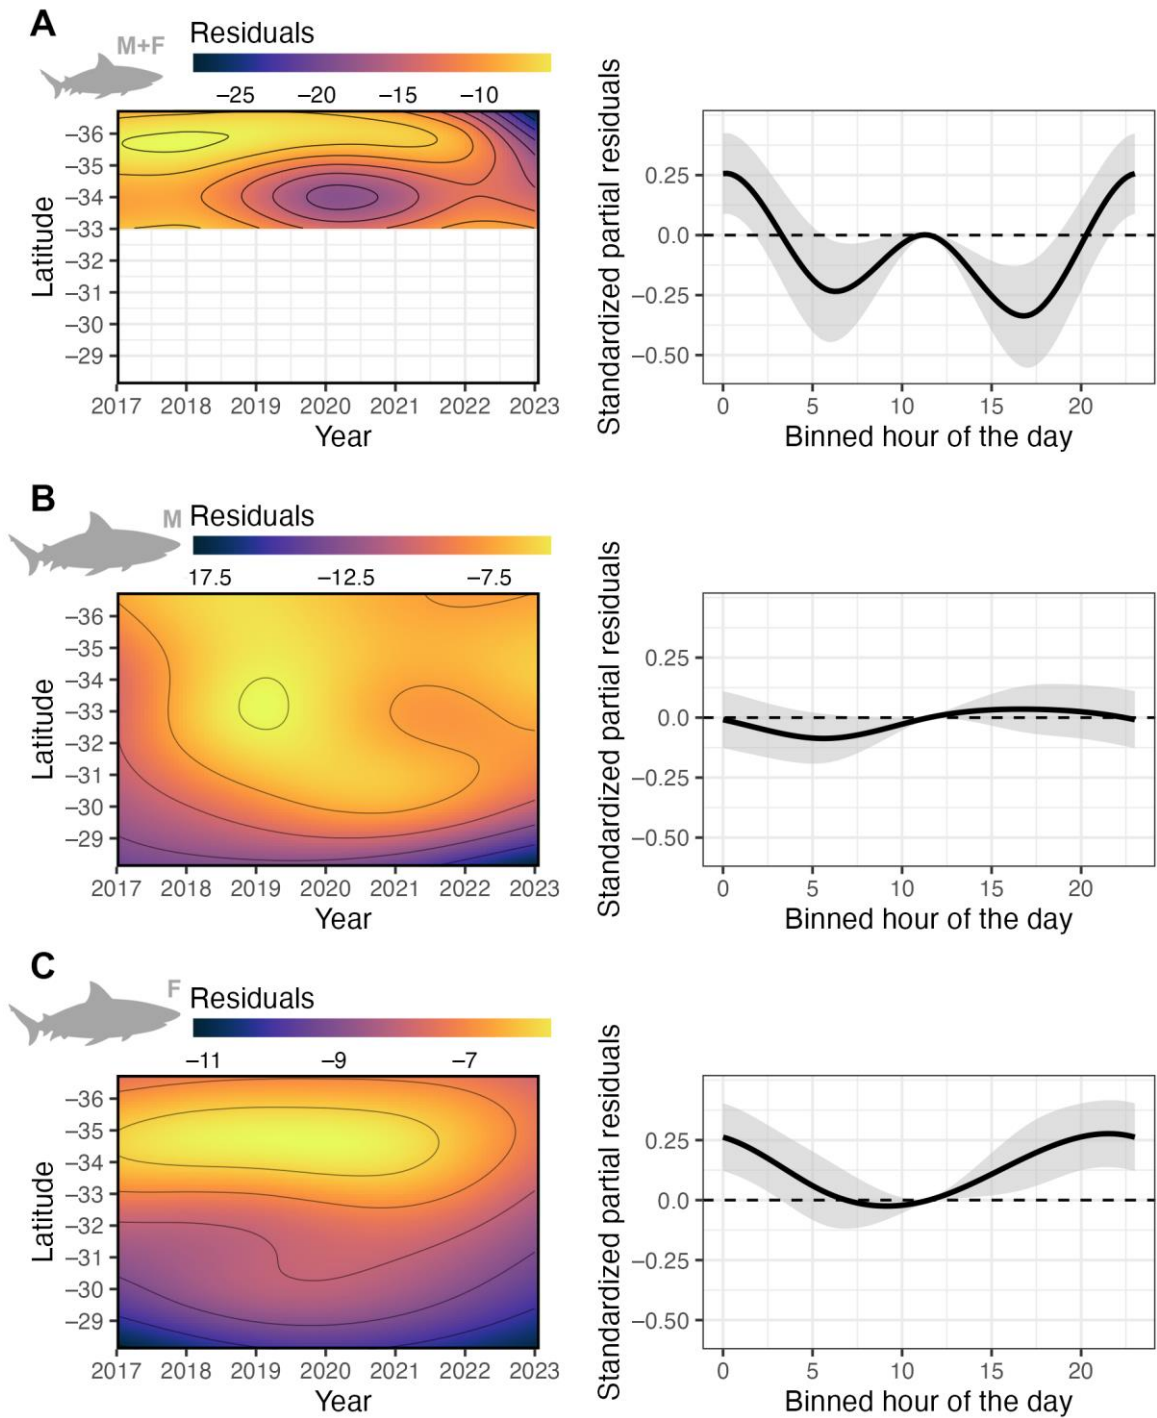

**Figure S3:** Group-specific spatio-temporal generalized additive models of (A) juvenile, (B) large male and (C) large female bull shark occurrence along the coast of New South Wales as a function of the interacting effects between latitude degree and year (left panel) and binned hour of the day (right panel). The colour scales (left panel) represent the corresponding fitted model residuals. Horizontal dashed lines and shaded areas (right panel) respectively represent the null effects and the 95% confidence intervals. Positive values on the vertical axis indicate an increased probability of occurrence, while negative values indicate an increased probability of absence (right panel).

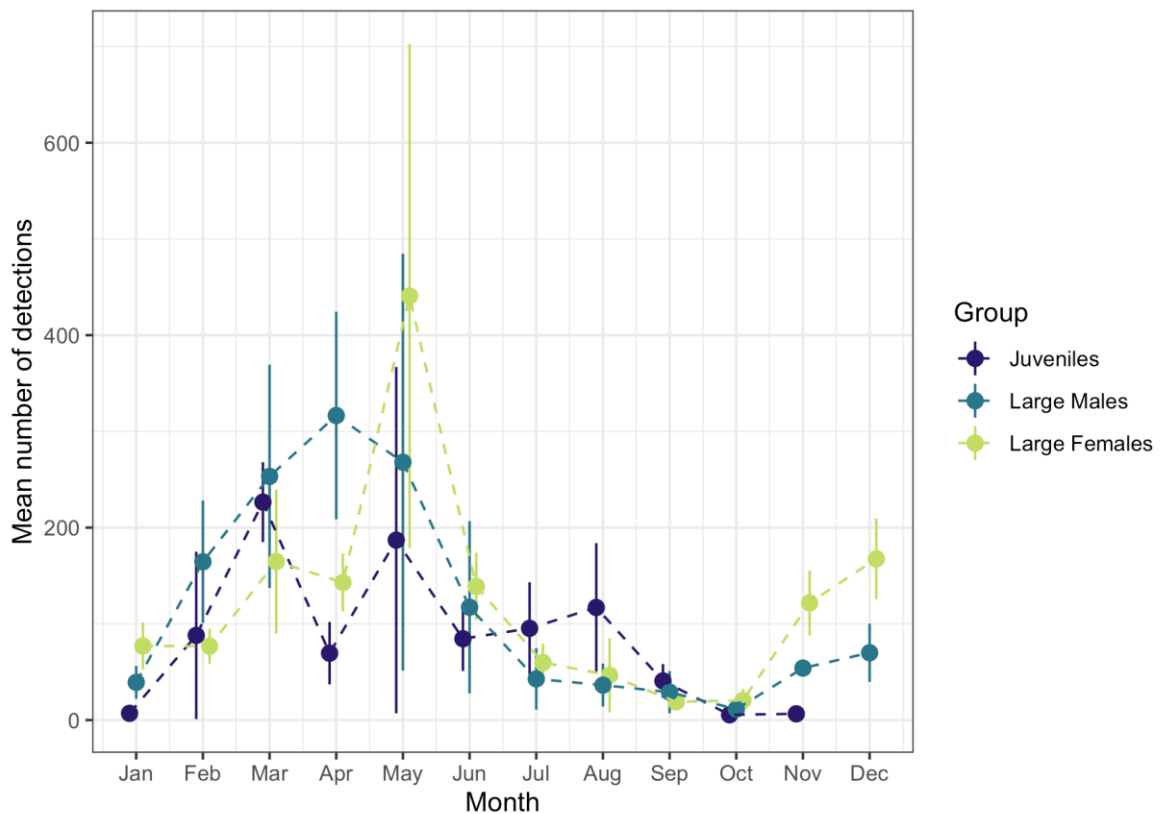

**Figure S4:** Mean ( $\pm$  SE) monthly occurrence of juveniles (80-174 cm TL), large males (176-312 cm TL) and large female (175-322 cm TL) bull sharks along the coast of New South Wales.

#### Data sources and dates of download:

Distance to river

<https://www.environment.gov.au/fed/catalog/search/resource/details.page?uuid=a8bd8d06-813b-4420-908b-a79c065cf533>; downloaded on 26 April 2023.

Manly Hydraulics

<https://mhl.nsw.gov.au/>; downloaded on 26 April 2023.

Bureau of Meteorology

<http://www.bom.gov.au/climate/data/>; downloaded on 26 April 2023.
